# Supplementary material for: Preselection of a sorption model based on a column test: the algorithm and an example of its application
Source: Springer Nature journal article supplement (doi:10.1007/s10040-021-02338-8), 2021-04-28
Supplement: MOESM1 [file 19115598]

**Preselection of a sorption model based on a column test: the algorithm and an example of its application.** Marek Marciniak*, Monika Okońska, Mariusz Kaczmarek

**Electronic supplementary material – Hydrogeology Journal**

- corresponding author, Institute of Physical Geography and Environmental Planning, Adam Mickiewicz University in Poznań, Poland, e-mail: [mmarc@amu.edu.pl](mailto:mmarc@amu.edu.pl)

**Matlab code for finding descriptors (**regarding the code please contact M. Kaczmarek, e-mail: mkk@ukw.edu.pl)

The code calculates six parameters, called descriptors, which quantify the impulse breakthrough curves:

- - time of maximum tracer concentration at the output *t*max[T]:

(1)

where *C*maxis the maximum tracer concentration at the output [ML-3]

- - spread of breakthrough curve ** [T]:

(2)

- - pulse width ratio ** [–]:

(3)

where *t*outis time when *C/C*0 > 0.01 at the output [T]. The time *t*1 was determined from the breakthrough curve *C*(*t*) as the last moment at which *C*(*t*1) < 0.01∙*C*0 [T]. Whereas the time *t*2 was determined from the breakthrough curve *C*(*t*) as the first moment at which *C*(*t*2) < 0.01·*C*0 [T]

- - amplitude ratio *φ*[–]:

(4)

- - asymmetry coefficient *θ* [–]:

(5)

where *S*Lis the area under the ascending part of the breakthrough curve [MTL-3] and *S*Ris the area under the descending part of the breakthrough curve [MTL-3]

- - relative tracer recovery *ε* [%]:

(6)

The input parameters (arguments of function DESCRIPTORS2) are the pulse concentration on the input *C*0, the input pulse duration in minutes *t*in, and number of additional interpolation points inserted (*jj*). After calling the DESCRIPTORS2 function with the given values of the input parameters *C*0, *t*in, *jj*, the program asks for a previously prepared text file with experimental data with two columns: in the first there is a time vector in minutes, and in the second the concentration vector in any units. After performing the calculations, the program will display the descriptor values in the command window.

DESCRIPTORS2.m

function Descriptors2(C0,tin,jj)

%

% AUTHOR: M. Kaczmarek (e-mail: mkk@ukw.edu.pl)

% DATE: 2/08/2019

% DESCRIPTION: The Matlab code calculates parameters (descriptors) to quantify the breakthrough curves

%

% INPUT PARAMETERS:

% C0 is the pulse concentration for the input,

% tin is the input pulse duration in minutes

% jj number of additional interpolation points inserted

[filename1,pathname1]=uigetfile('*.*','Select data file'); longfilename1=strcat(pathname1,filename1); dane=load(longfilename1);

[nt,nc] = size(dane); d1=dane;

t=d1(:,1);

ce=d1(:,2);

x=d1(:,1);

y=d1(:,2);

for i=1:nt-1 for j=1:jj+1

kk=(i-1)*(jj+1)+j;

x1(kk)=x(i)+(j-1)*(x(i+1)-x(i))/(jj+1); % end

end

y1=interp1(x,y,x1,'pchip');% 'nearest','linear','spline','pchip','cubic', 'v5cubic' figure(1);

plot([0 tin tin],[C0 C0 0],'--',x,y,'o',x1,y1,'.'); legend('Cin','Exp. data','Data after interpolation'); xlabel('Time [min]');ylabel('Concentration [-]'), pt=[x1',y1'];

[filename1,pathname1]=uiputfile('*.txt','Save results of interpolated data'); longfilename1=strcat(pathname1,filename1);

save(longfilename1,'pt','-ASCII');

%%%%% DETERMINATION OF DESCRIPTORS

% tmax - time of maximum concentration

% disp (' _time of maximum concentration [s]'); [maxy,indmax]=max(y1);

tmax=x1(indmax); tmax_s=tmax;

% disp (' time of maximum concentration [min] '); tmax_min=tmax;

%% Obliczenia pomocnicze h=diff(x1);

y1l=y1(1:end-1);y1u=y1(2:end); C1=sum(0.5*h.*(y1l+y1u));

tt=x1-tmax;tt1=tt(1:end-1);tt2=tt(2:end);

x11=x1(1:indmax);x12=x1(indmax:end);h11=diff(x11);h12=diff(x12); y11=y1(1:indmax);y11l=y11(1:end-1);y11u=y11(2:end);y12=y1(indmax:end); y12l=y12(1:end-1);y12u=y12(2:end); Sl=sum(0.5*h11.*(y11l+y11u));Sr=sum(0.5*h12.*(y12l+y12u));

hh=diff(tt); C2=sum(0.5*hh.*(tt1.*tt1.*y1l+tt2.*tt2.*y1u));

nosmal1=sum(y11/C0<0.01); nosmal2=sum(y12/C0<0.01); tout=(x1(end-nosmal2)-x1(nosmal1));

%% eps - relative tracer recovery

disp (' relative tracer recovery[%]_ '); eps_0=100*C1/(C0*tin)

%% tmax - time of maximum concentration

disp (' time of maximum concentration [min] '); tmax_min=tmax

%% sigma - spread of breakthrough curve

% disp (' spread of breakthrough curve [s] ');

% sigma_s=sqrt(C2/C1)

disp (' spread of breakthrough curve [min] '); sigma_min=sqrt(C2/C1)

%% tau - pulse width ratio

disp (' pulse width ratio '); tau=tout/tin

%% fi - amplitude ratio

disp (' amplitude ratio '); fi=maxy/C0

%% theta - asymetry coefficient

disp (' asymetry coefficient '); theta= (Sr-Sl)/(Sr+Sl)
